# Supplementary figures and images for: Long-term trends and future projections of larynx cancer burden in China: a comprehensive analysis from 1990 to 2030 using GBD data
Source: PubMed Central journal article supplement — Sci Rep. 2024 Nov 3;14:26523. doi: 10.1038/s41598-024-77797-6 (PMC11532332; doi:10.1038/s41598-024-77797-6), 2024-11-03

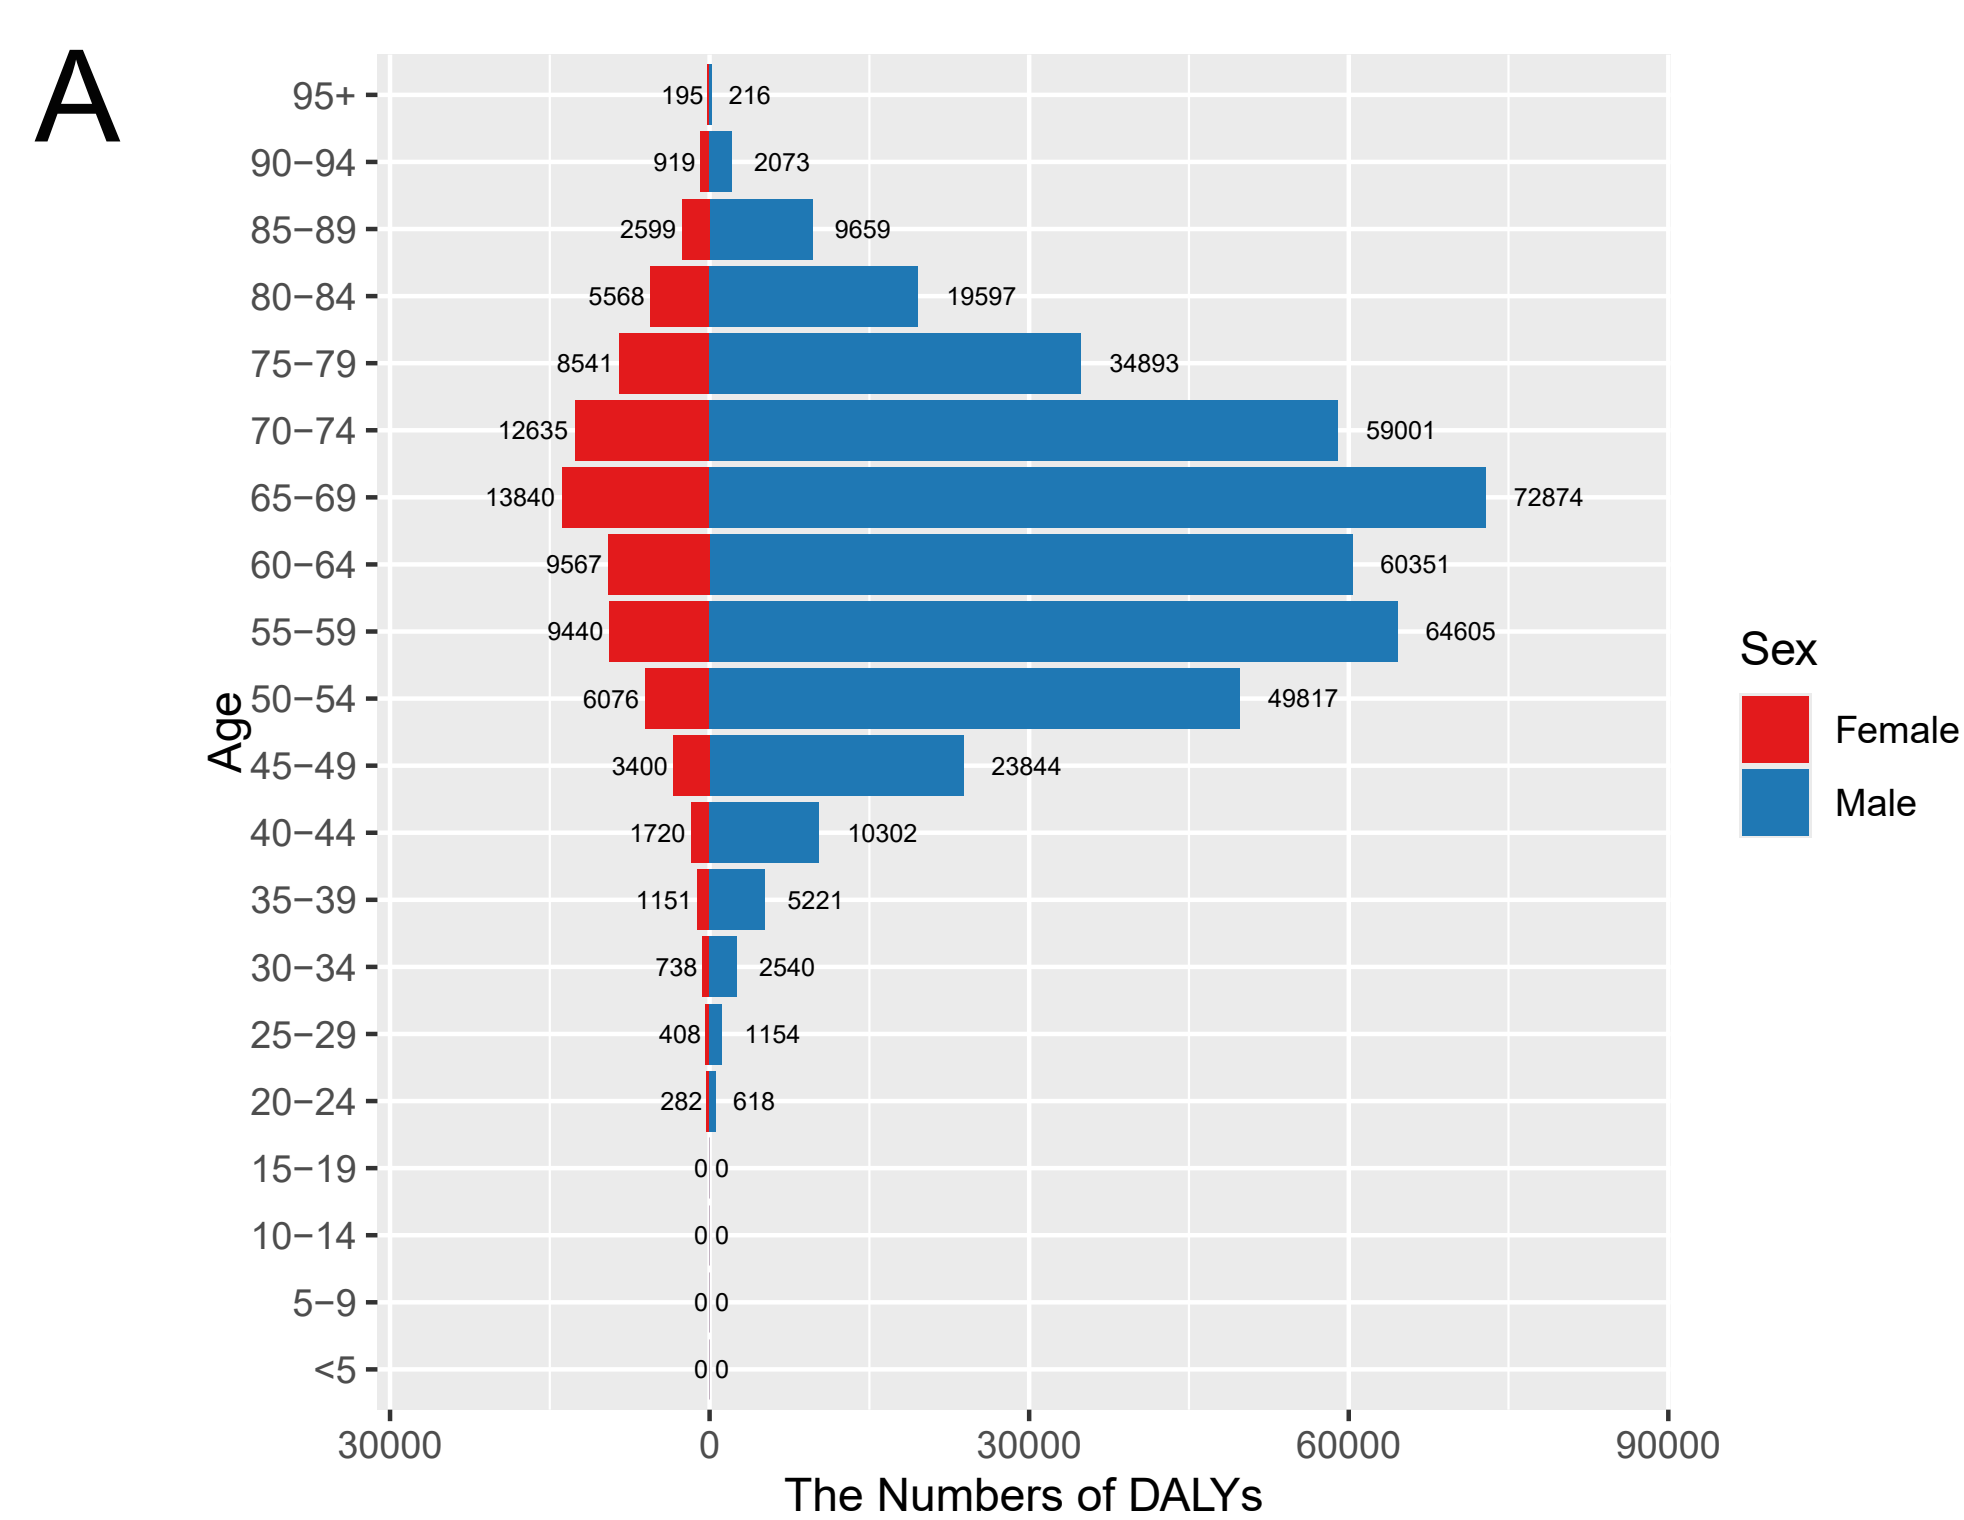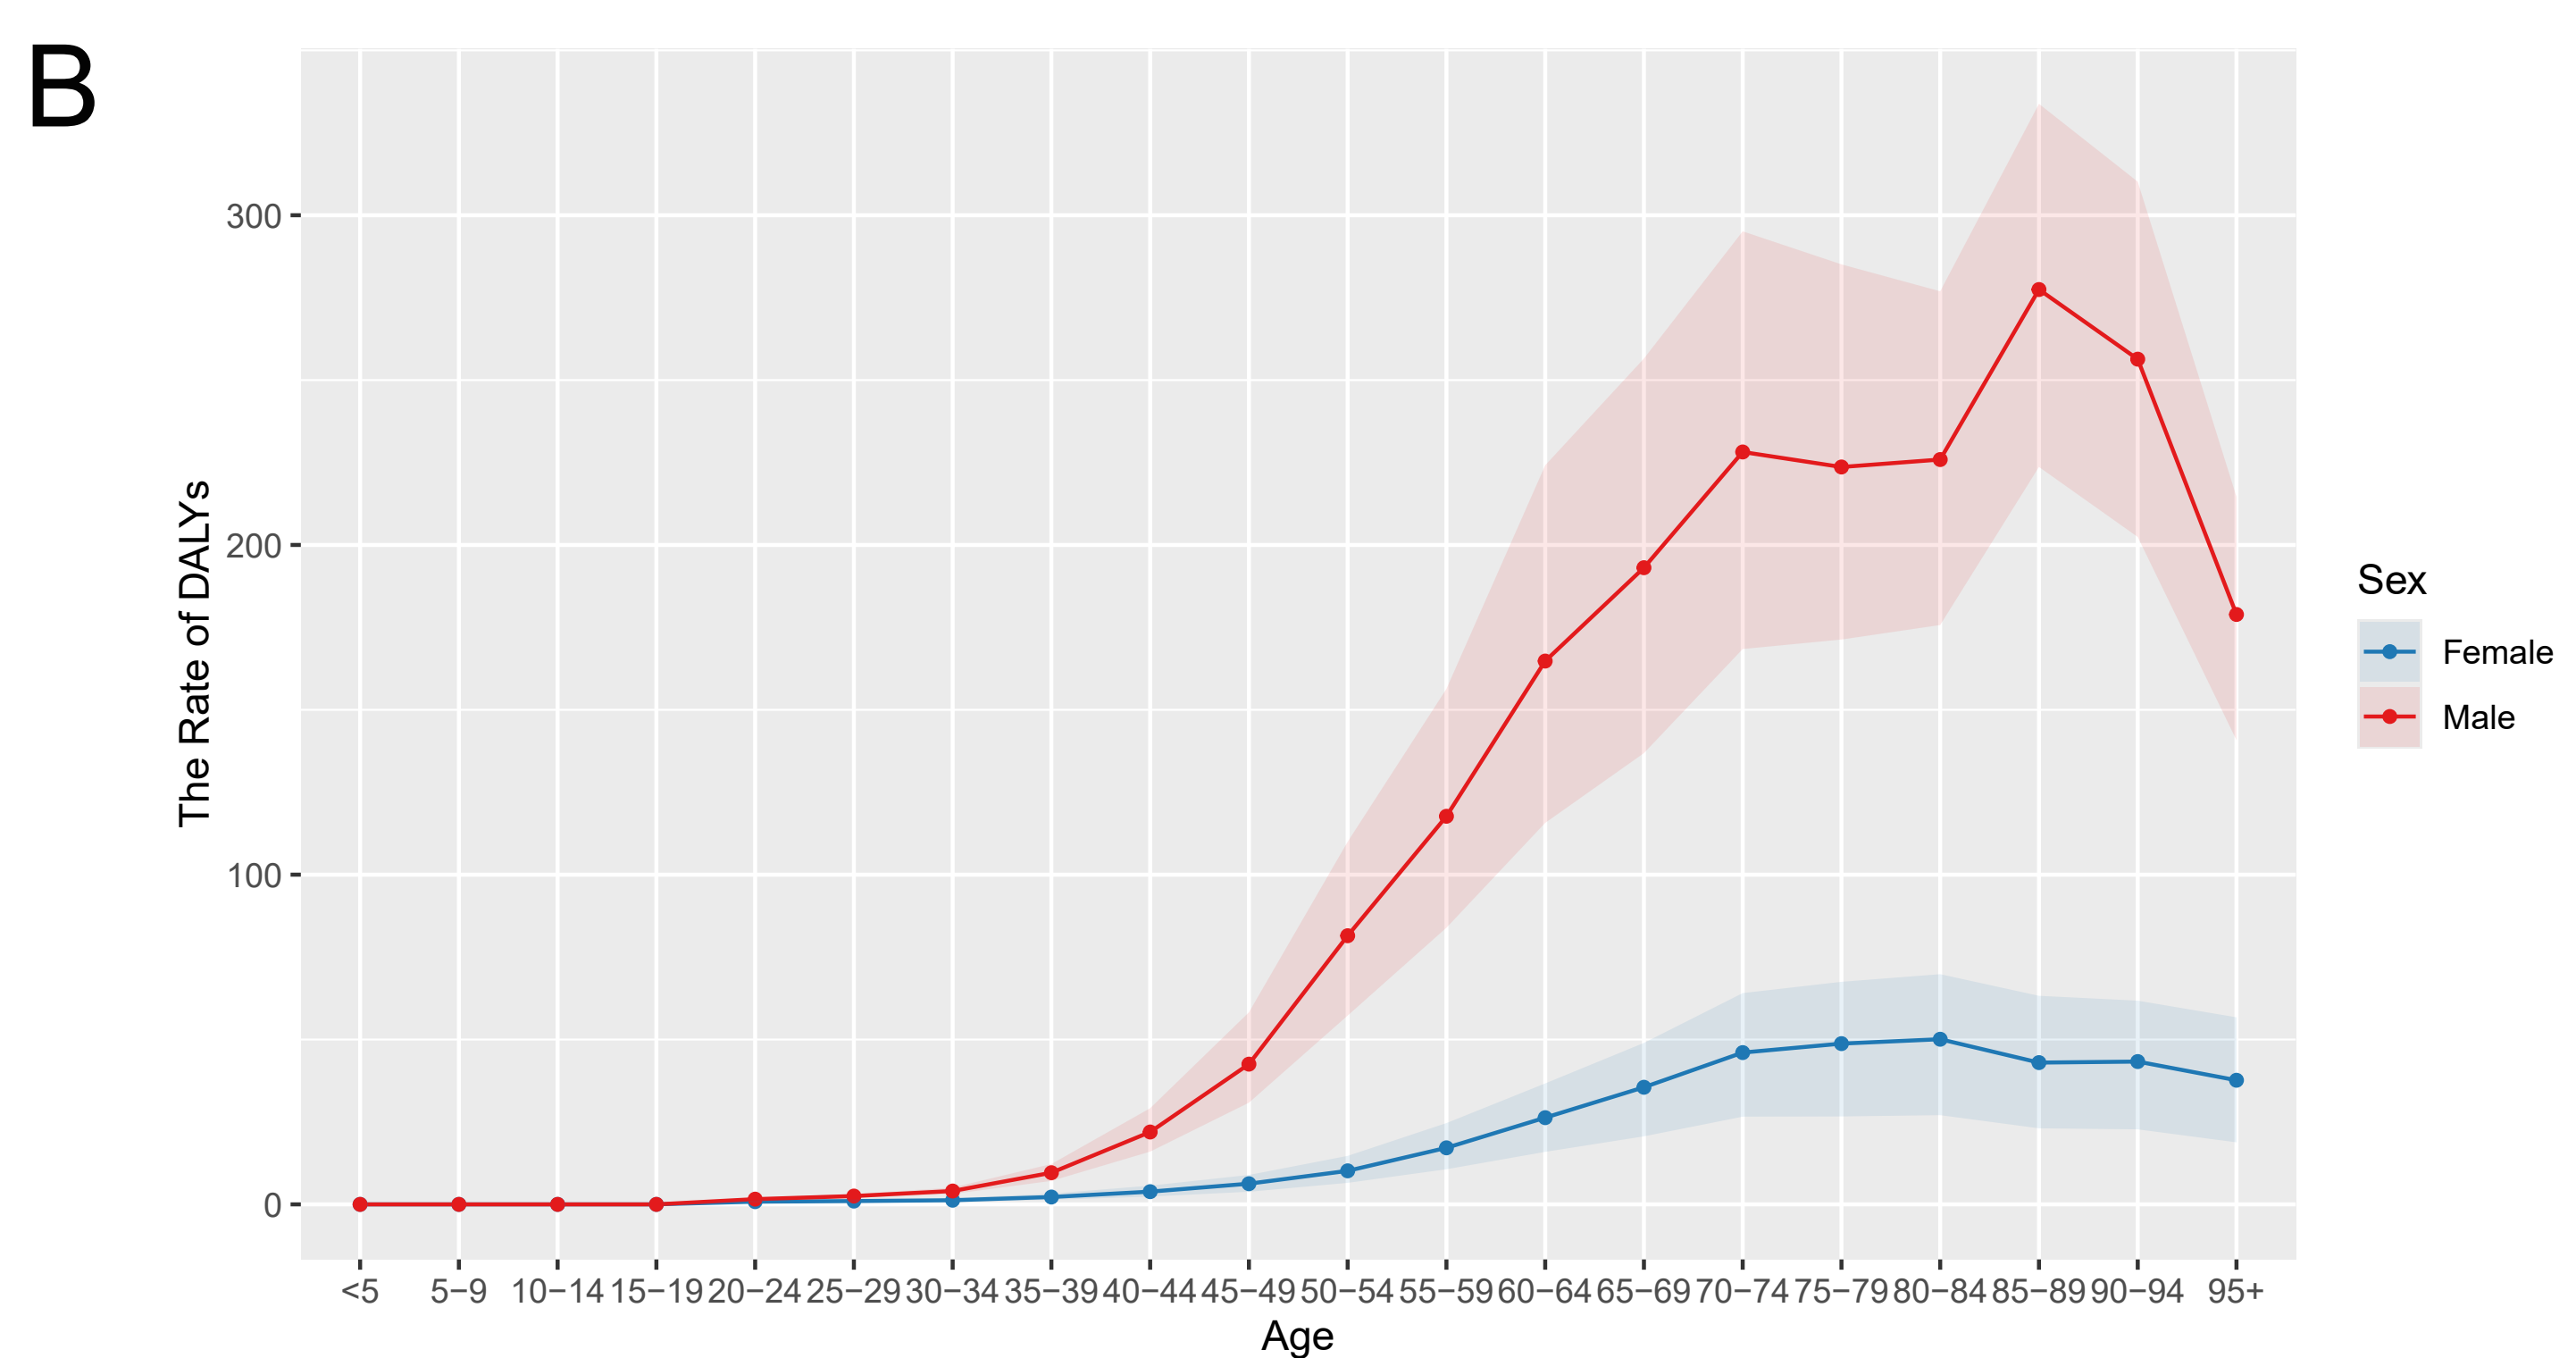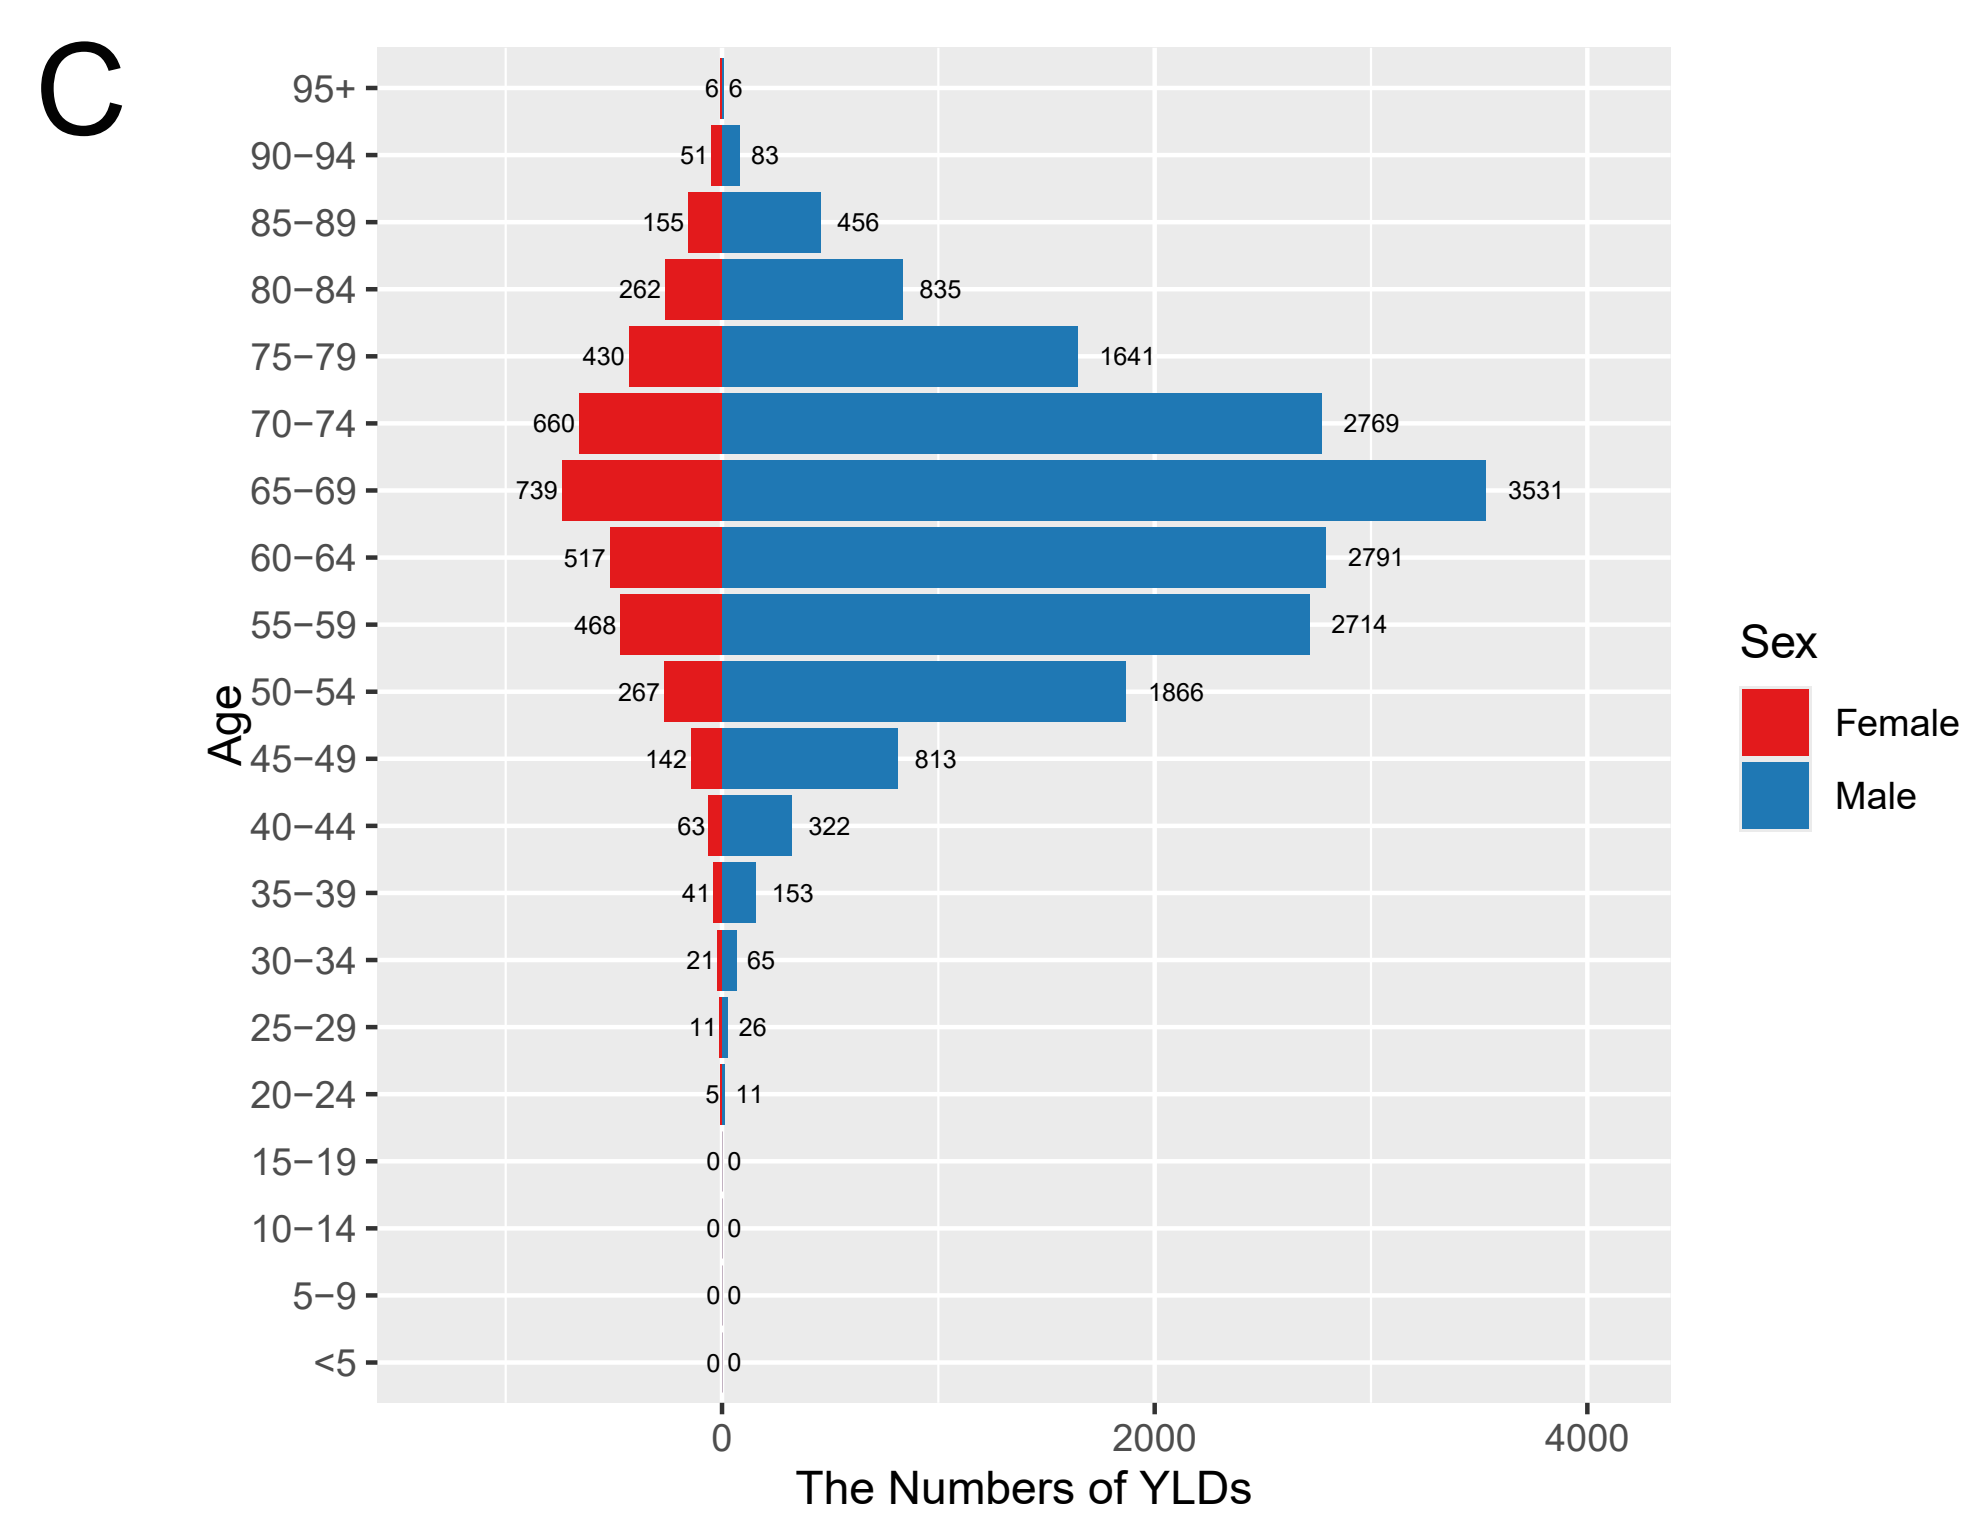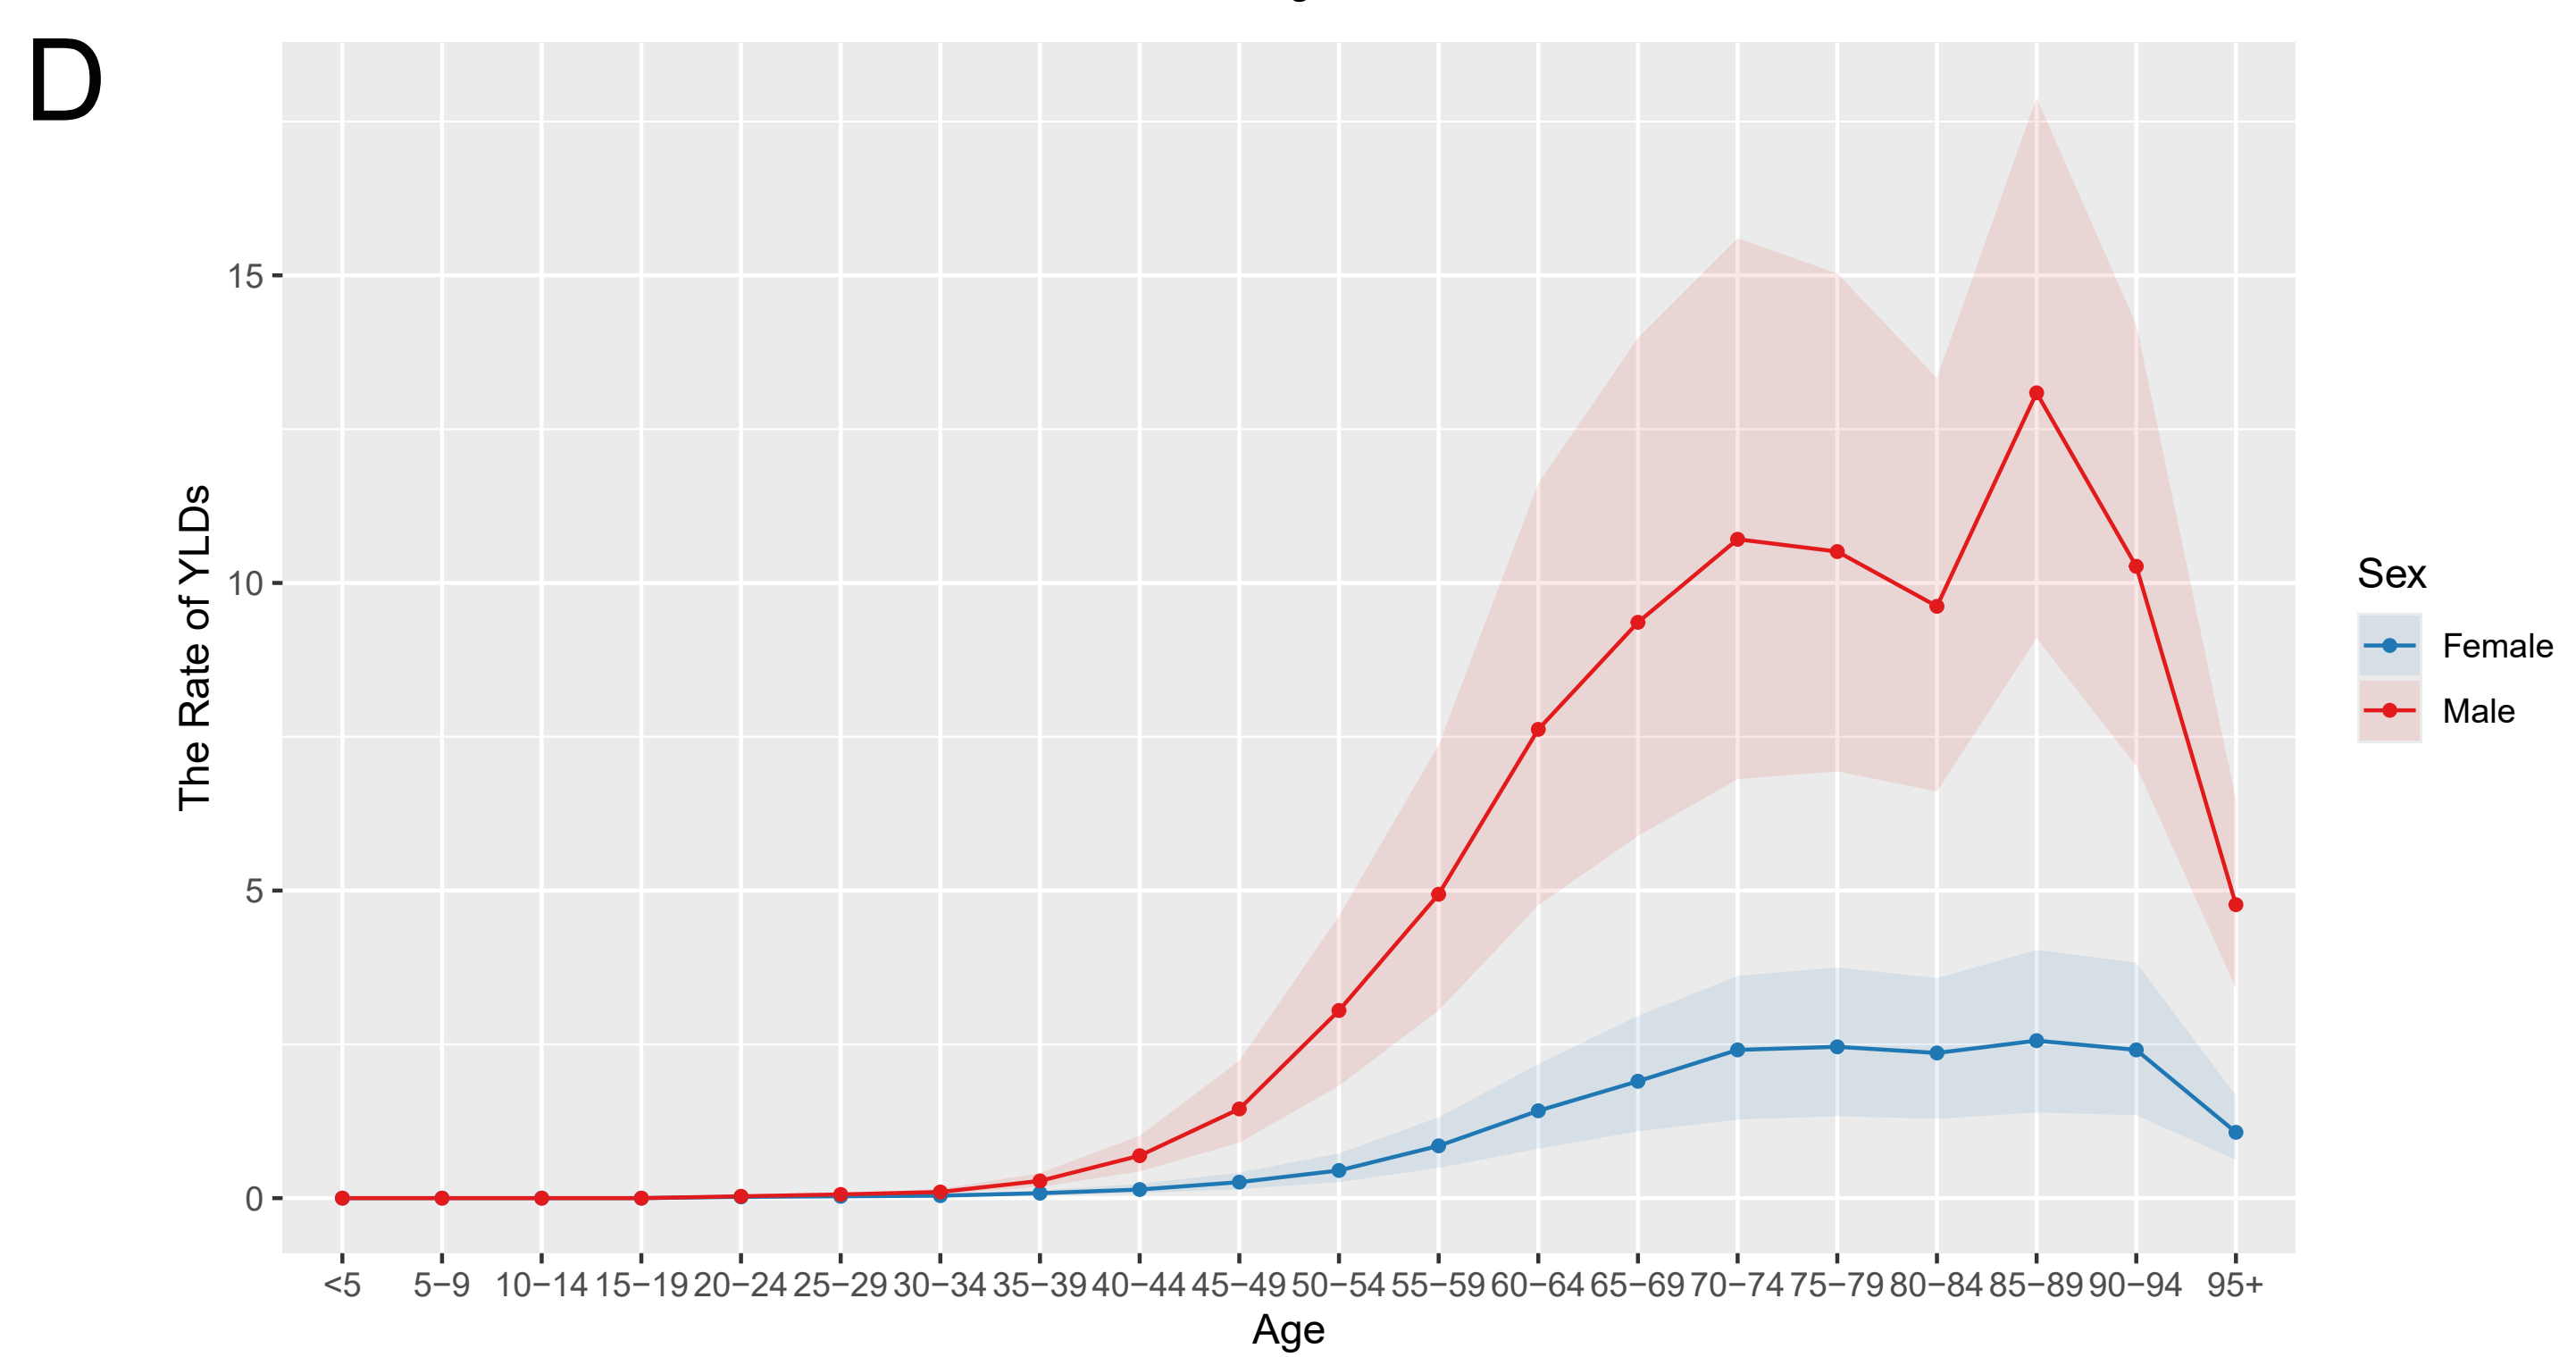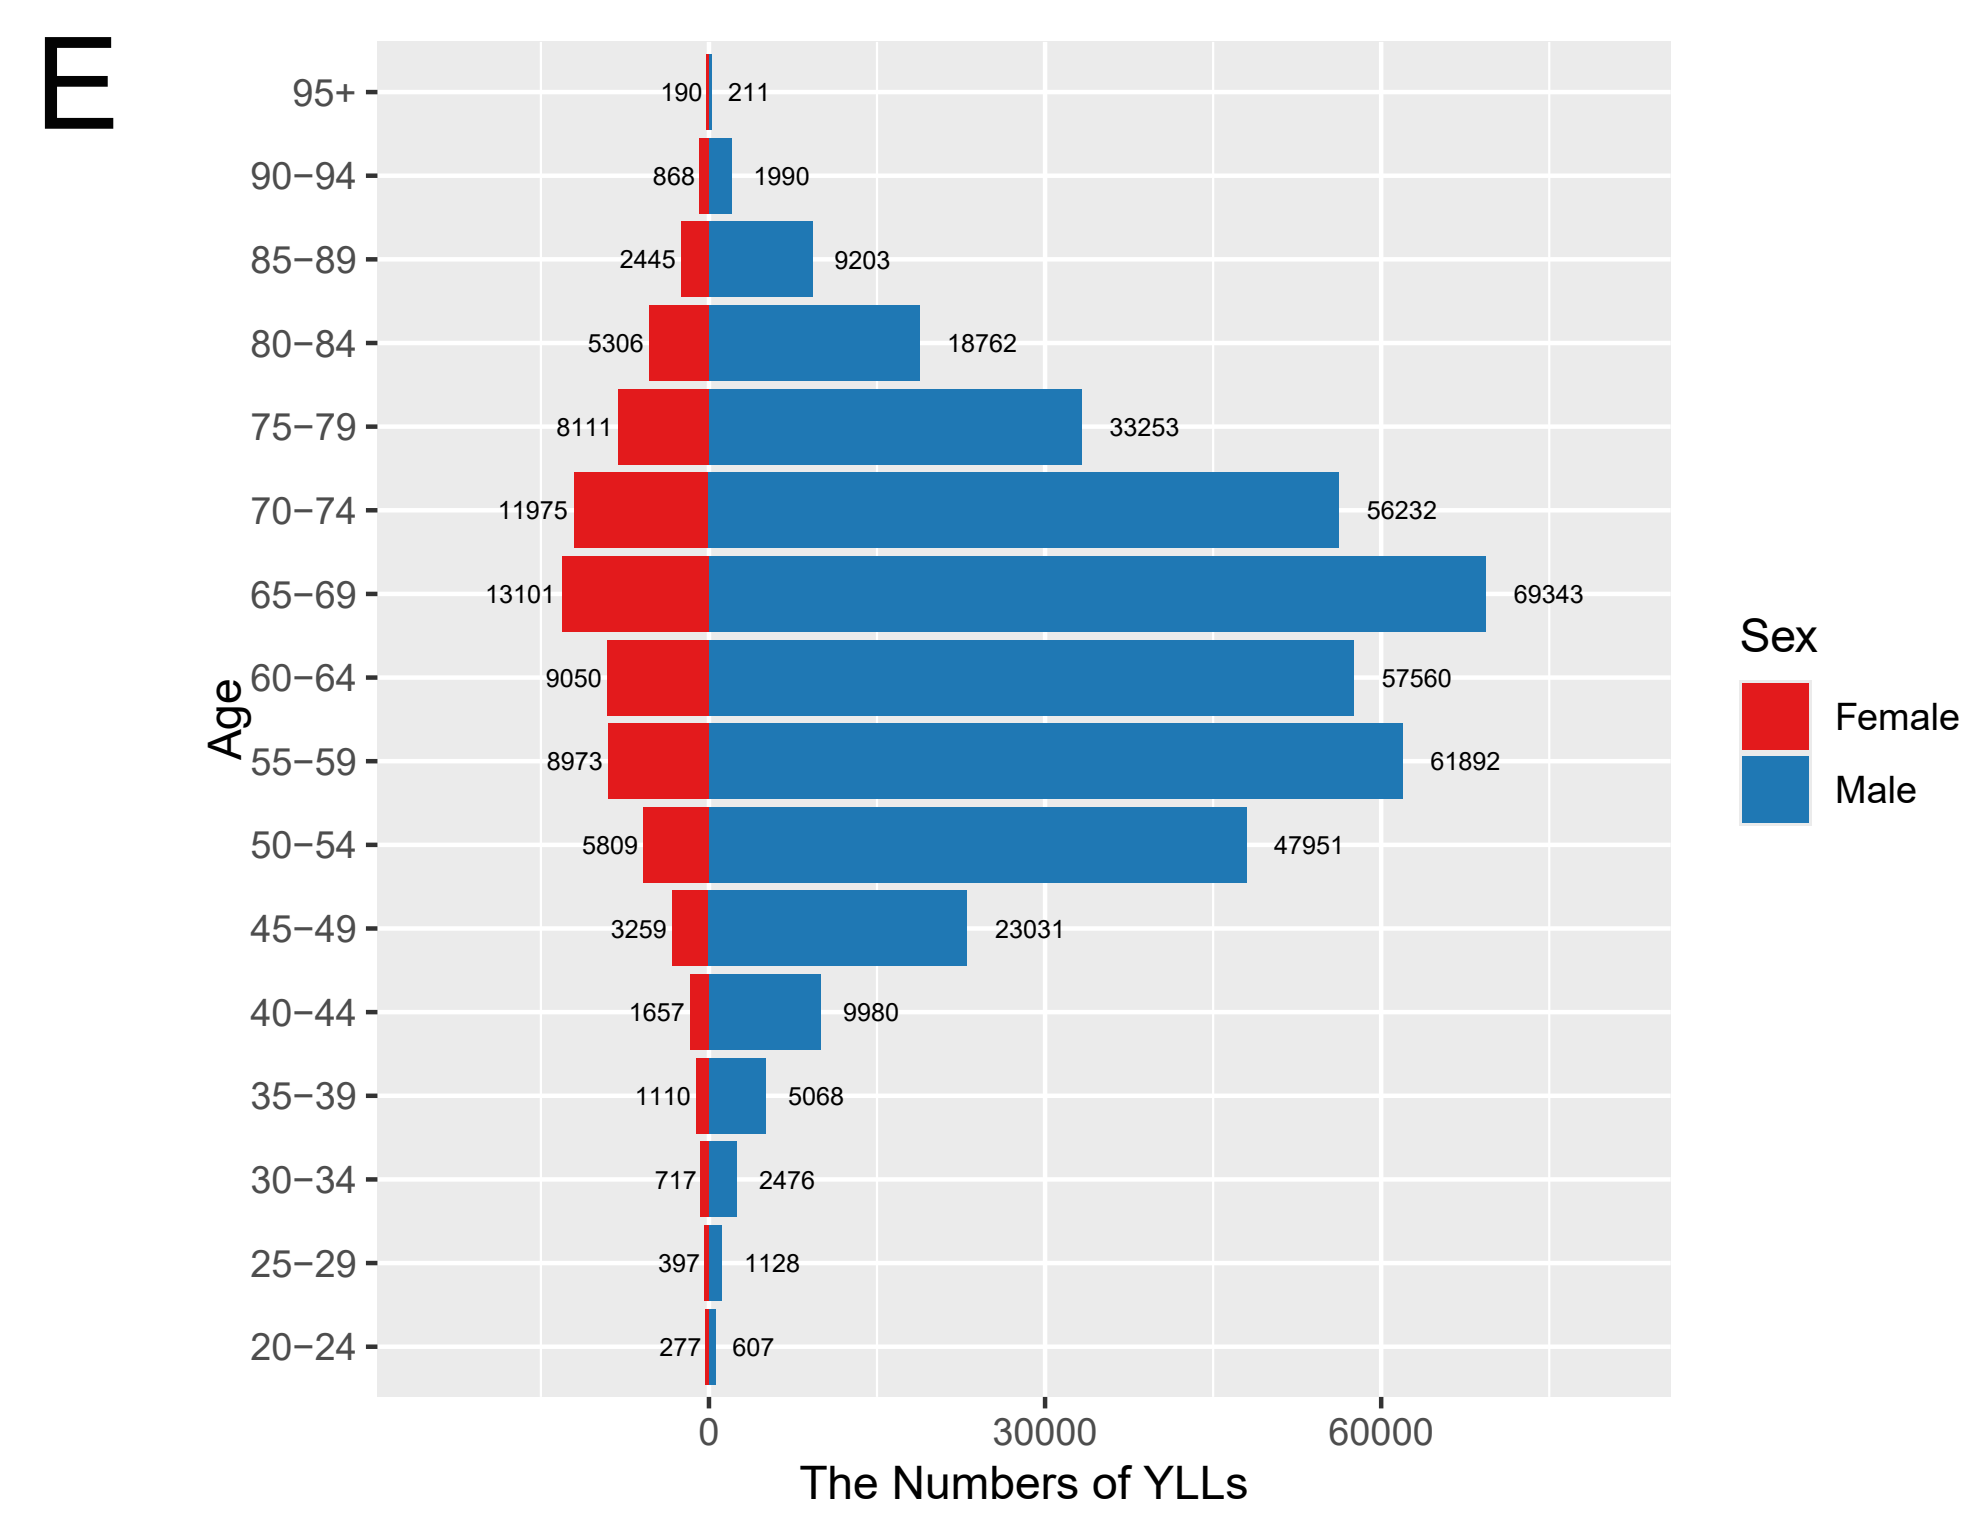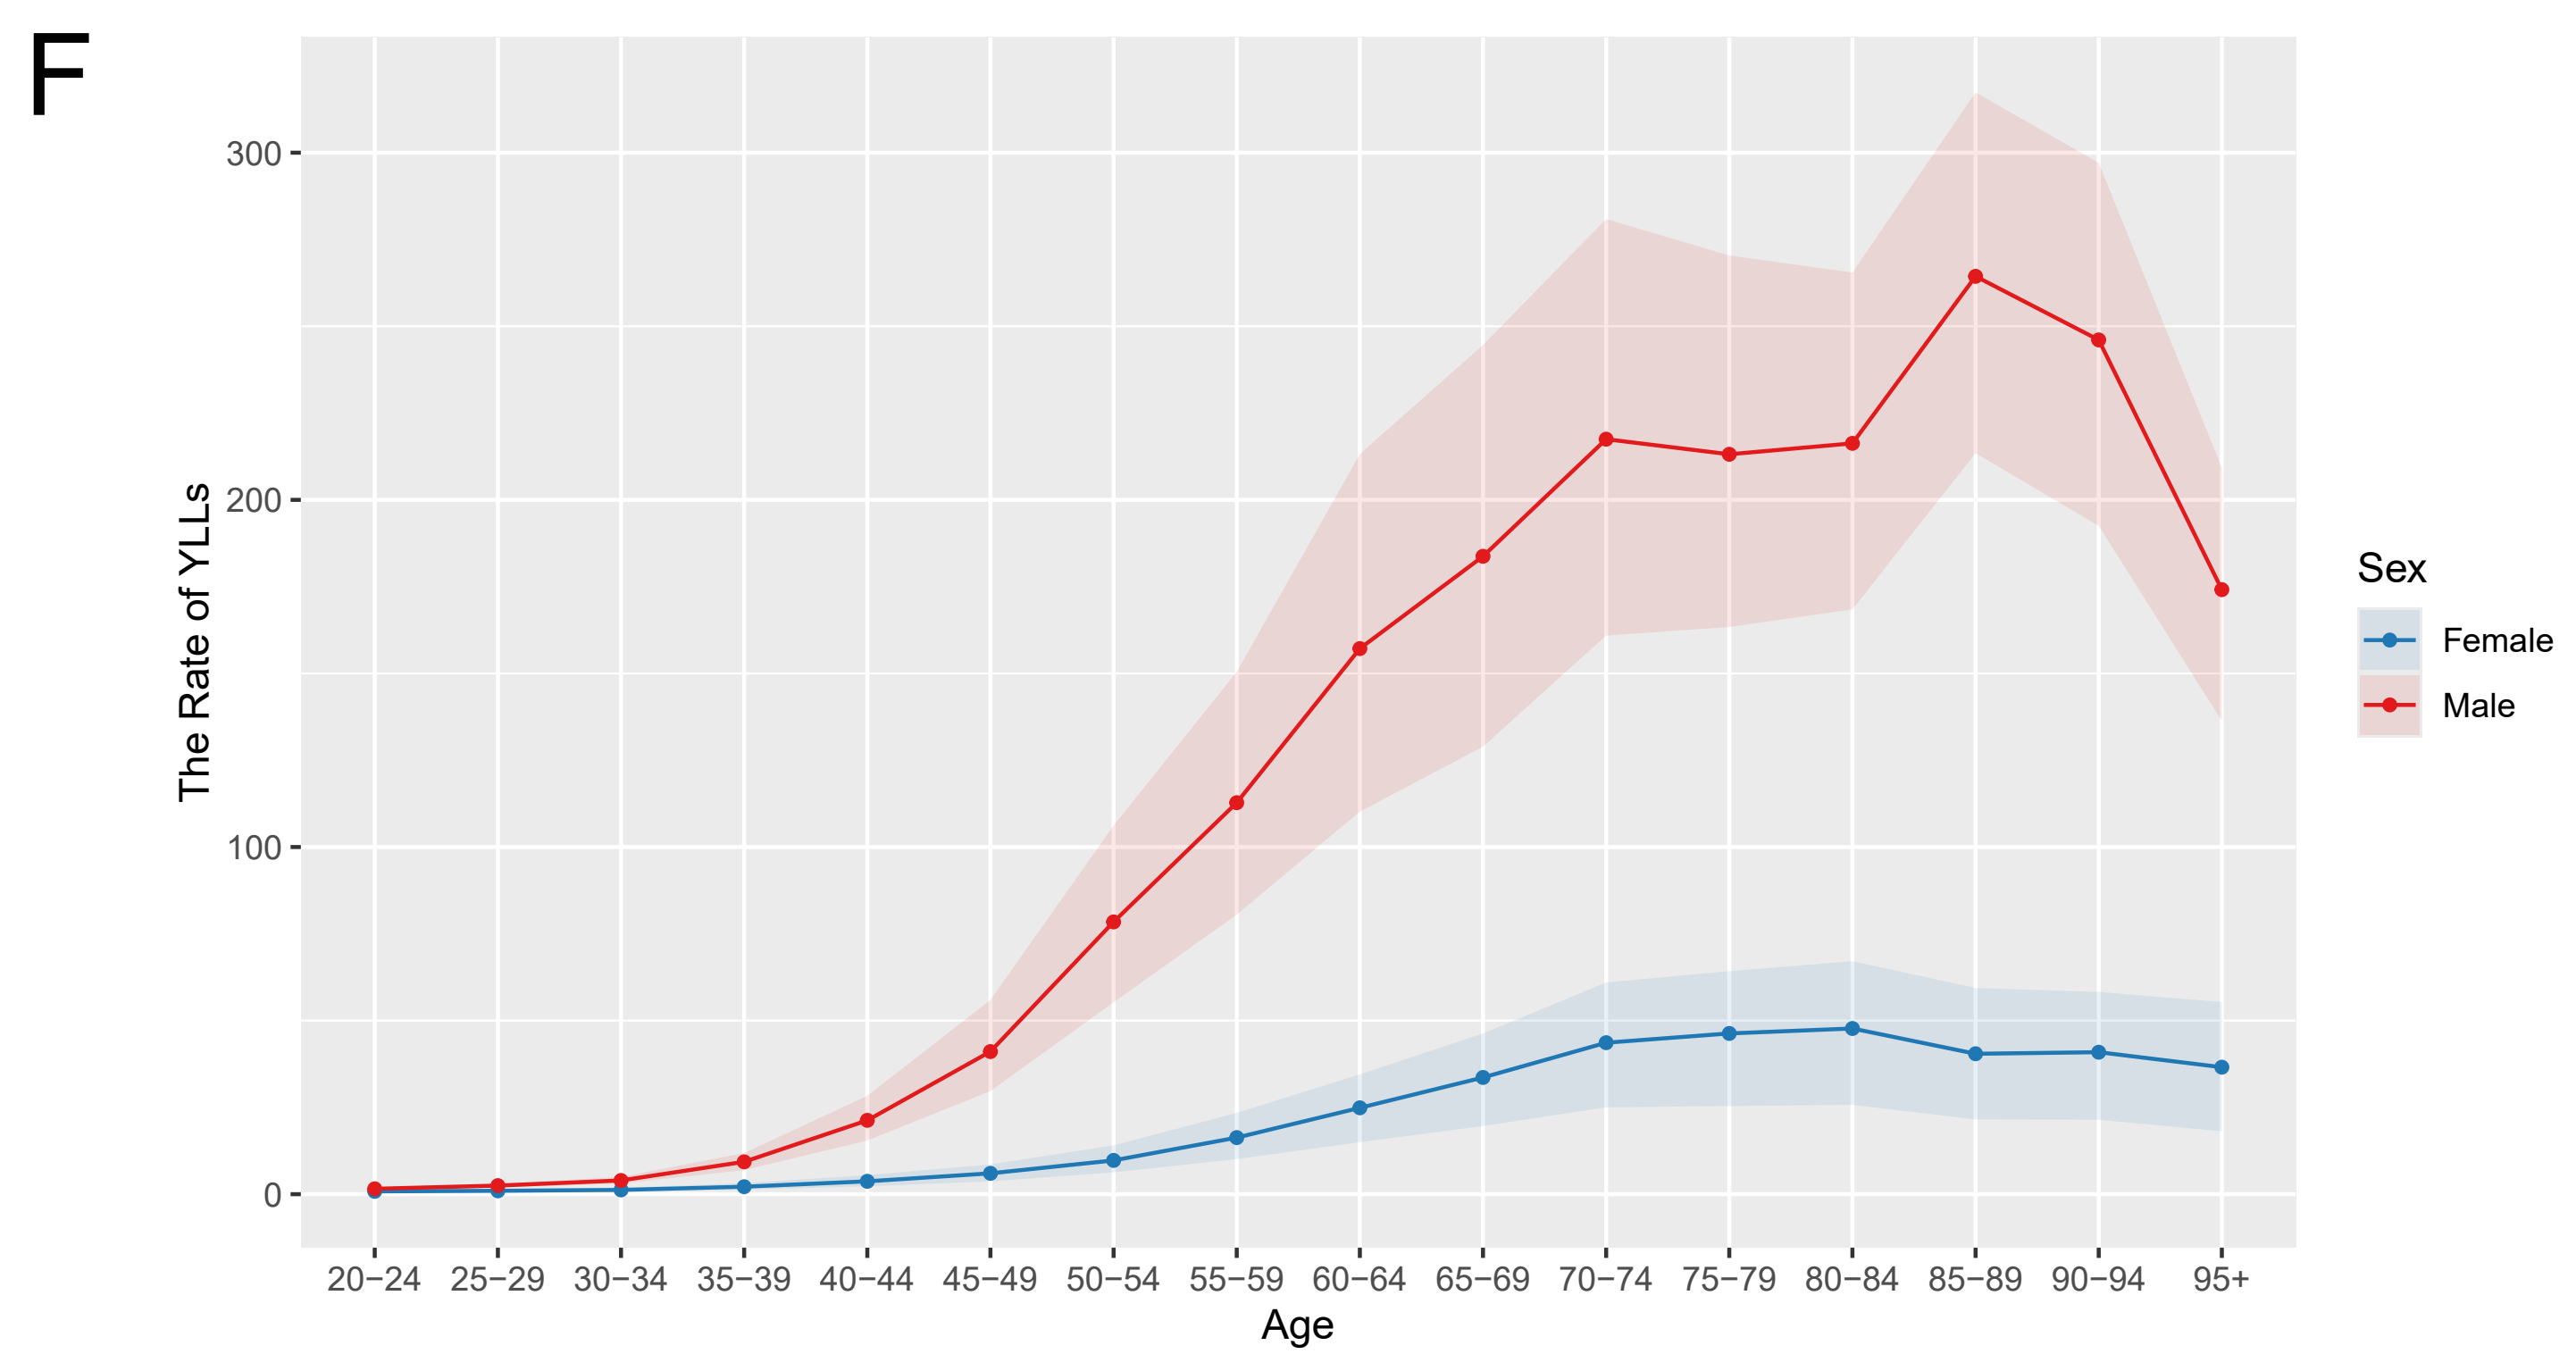

Supplement: 41598_2024_77797_MOESM1_ESM.pdf [file 41598_2024_77797_MOESM1_ESM.pdf]
